# Supplementary material for: Reduced graphene oxide-incorporated calcium phosphate cements with pulsed electromagnetic fields for bone regeneration
Source: Royal Society of Chemistry journal article supplement (doi:10.1039/d1ra05717k), 2022-01-01
Supplement: d1ra05717k1.pdf [file d1ra05717k1.pdf]

## Supporting Information

Reduced Graphene Oxide-Reinforced Natural Calcium Phosphate Cements for Bone Tissue Engineering

Hoon Seonwoo<sup>1,2,†</sup>, Han-Wool Choung<sup>3,†</sup>, Sangbae Park<sup>4,†</sup>, Kyoung Soon Choi<sup>5</sup>, Kyoung-Je Jang<sup>6</sup>, Jangho Kim<sup>7</sup>, Ki Taek Lim<sup>8</sup>, Yeonju Kim<sup>9</sup>, Pankaj Garg<sup>4</sup>, Shambhavi Pandey<sup>4</sup>, Joo Lee<sup>2,10</sup>, Joo-Cheol Park<sup>3</sup>, Yun-Hoon Choung<sup>9</sup>, Pill-Hoon Choung<sup>11</sup>, Soo Young Kim<sup>12,\*</sup>, and Jong Hoon Chung<sup>13,14,15,16\*</sup>

## Experimental Section

### Energy-Dispersive X-Ray Spectroscopy (EDS)

The points of study were determined and analyzed with EDS mounted in FESEM (SUPRA 55VP, Carl Zeiss, Germany). This resulted in a histogram, where the horizontal axis displays units of energy [kilo electron volts (keV)] and the vertical axis represent the intensity.

### Soaking Test

To perform the bioactivity test, simulated body fluid (SBF) was prepared by dissolving NaCl, NaHCO<sub>3</sub>, KCl, K<sub>2</sub>HPO<sub>4</sub>·3H<sub>2</sub>O, MgCl<sub>2</sub>·6H<sub>2</sub>O, and Na<sub>2</sub>SO<sub>4</sub> in distilled water and HCl to reach a pH value of 7.4, following the protocol of Kokubo et al[45]. Each bone cement specimen was immersed in 500 µl of SBF for 7, 14, or 21 days at 37°C and 100% humidity. The SBF was replaced with fresh SBF every week. After the due date, each specimen was collected and dried at 37°C and 100% humidity. The dried samples were weighed, and their mechanical properties were analyzed by texture analyzer.

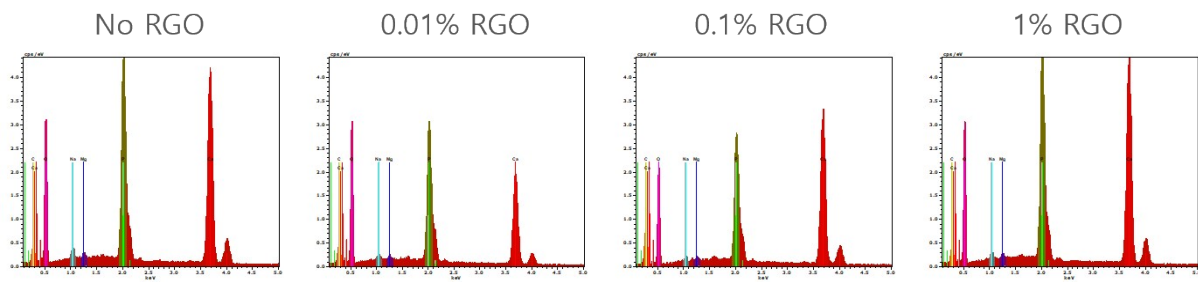

**Figure S1.** EDS analysis results. An existence of calcium and phosphate elements was confirmed. EDS: energy-dispersive X-ray spectroscopy

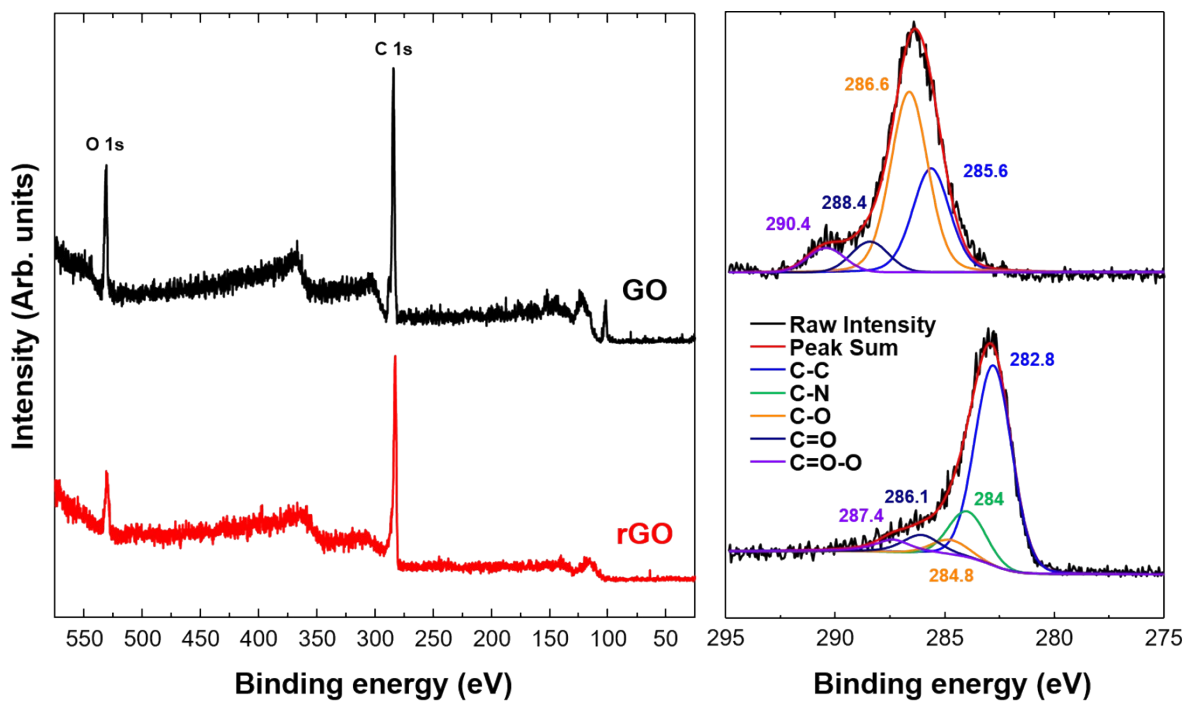

**Figure S2.** XPS results of GO and RGO. O1s peak of GO decreased compared to RGO. Whereas, C-C bonding in C1s peak increased. XPS: X-ray photoelectron spectroscopy, GO: graphene oxide, RGO: reduced graphene oxide.

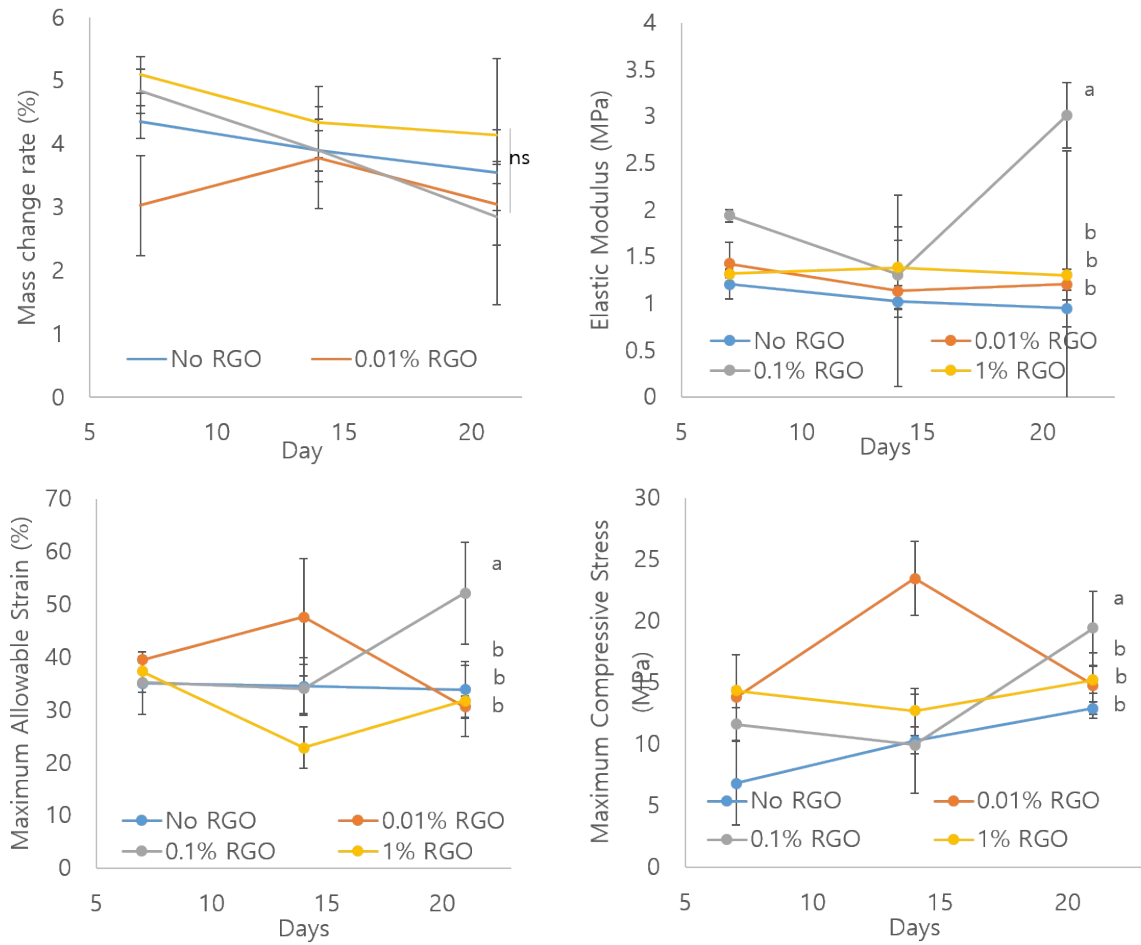

**Figure S3.** Soaking study of RGO-CPCs. The mass change rate, elastic modulus, maximum allowable strain, and maximum compressive stress were investigated for 3 weeks. The elastic modulus, maximum allowable strain, and maximum compressive stress of 0.1% RGO were significantly improved in comparison with the other samples. (n = 5, LSD)

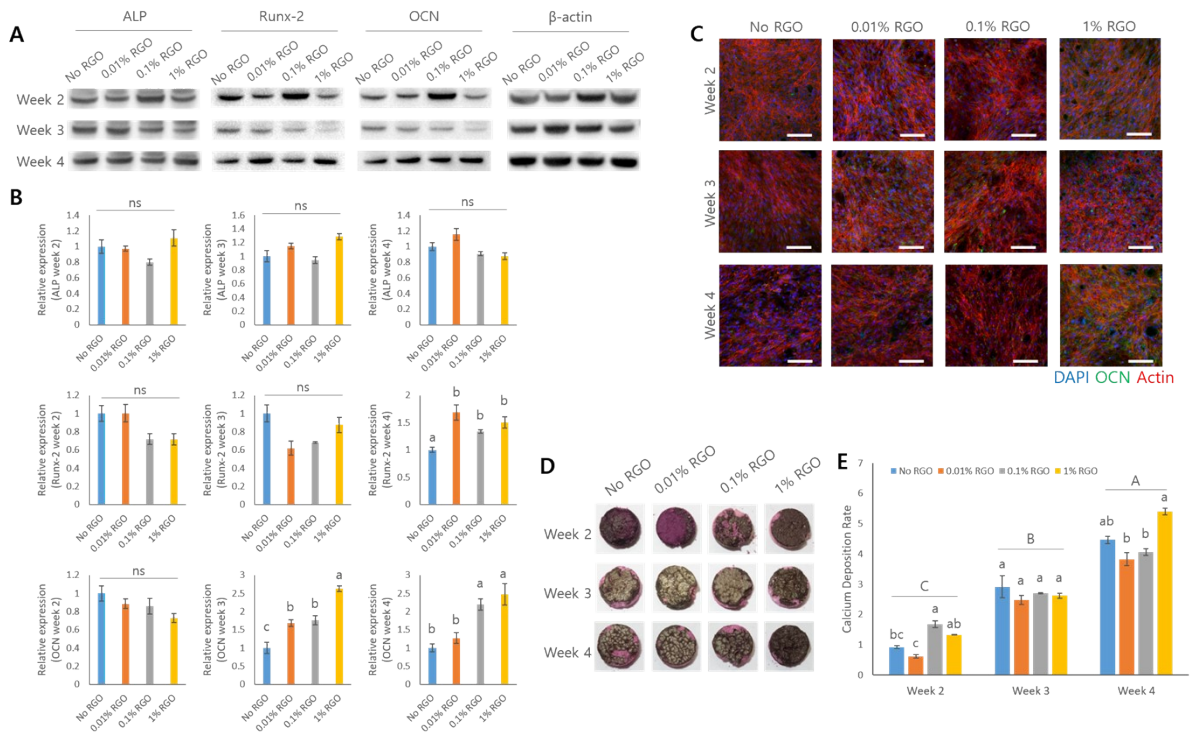

**Figure S4.** Osteogenic differentiation study of MC3T3-E1 (A) Representative western blot result. ALP, Runx-2, OCN, and  $\beta$ -actin expressions were evaluated during 4 weeks. (B) The relative expressions of osteogenic marker protein were calculated. The expression of ALP was not significantly different during 4 weeks. The expression of Runx-2 and OCN showed discrete differences in week 4. (C) ICC results. OCN expression for 4 weeks is depicted. At 4 weeks, 1% RGO had the highest OCN expression. Scale bars = 100  $\mu$ m. (D) Representative images of ARS. (E) Quantitative analysis of ARS. The calcium deposition rate of 1% RGO in week 4 showed the highest value with significant difference. (n = 5, LSD) ALP: alkaline phosphatase, Runx-2: runt-related transcription factor-2, OCN: osteocalcin, ICC: immunocytochemistry, ARS: alizarin red staining

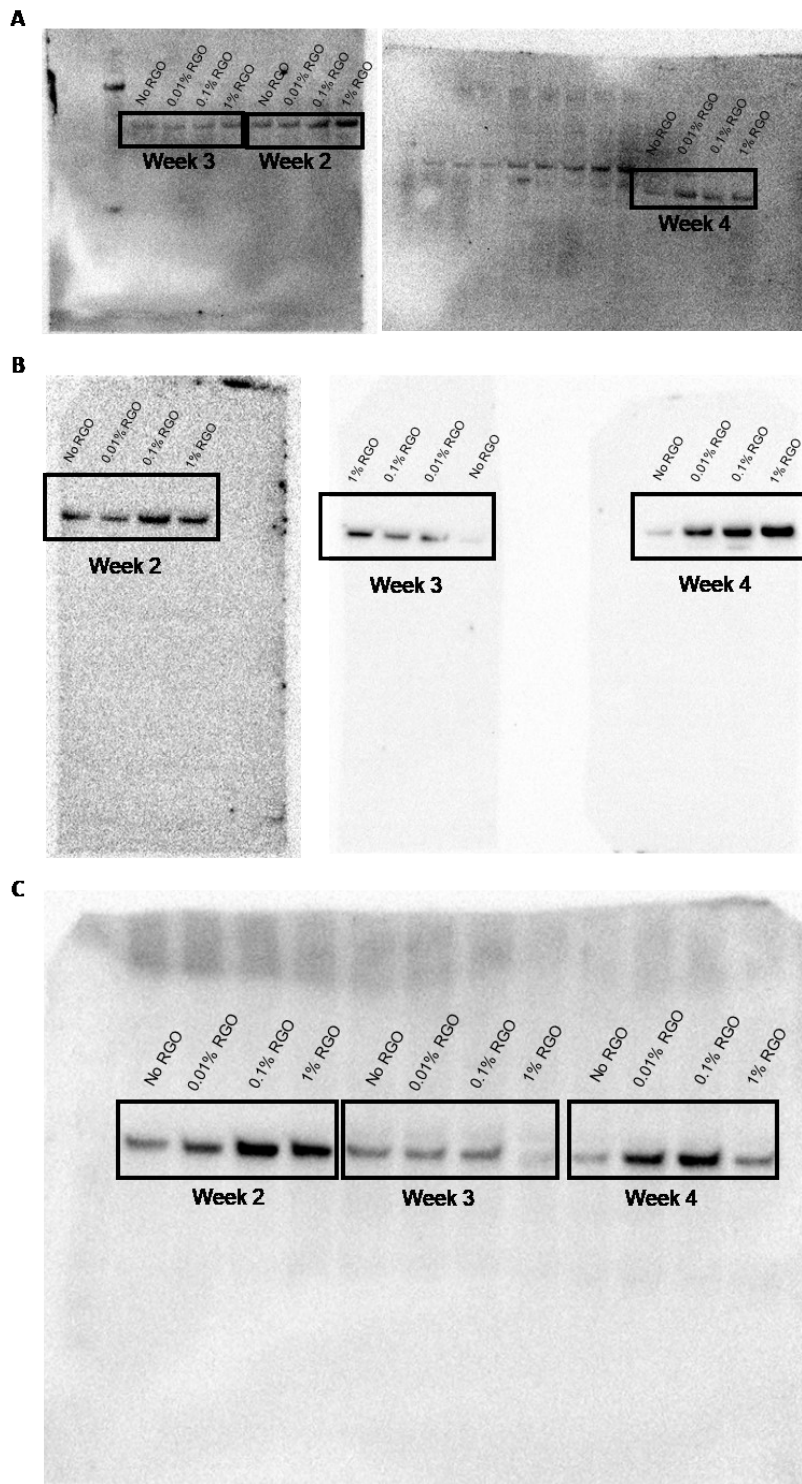

**Figure S5.** Osteogenic differentiation study of cells used in this study. Full gel images of the representative western blot results. (A)ALP, (B)OCN and (C) $\beta$ -actin expression of rASC were evaluated for 4 weeks.

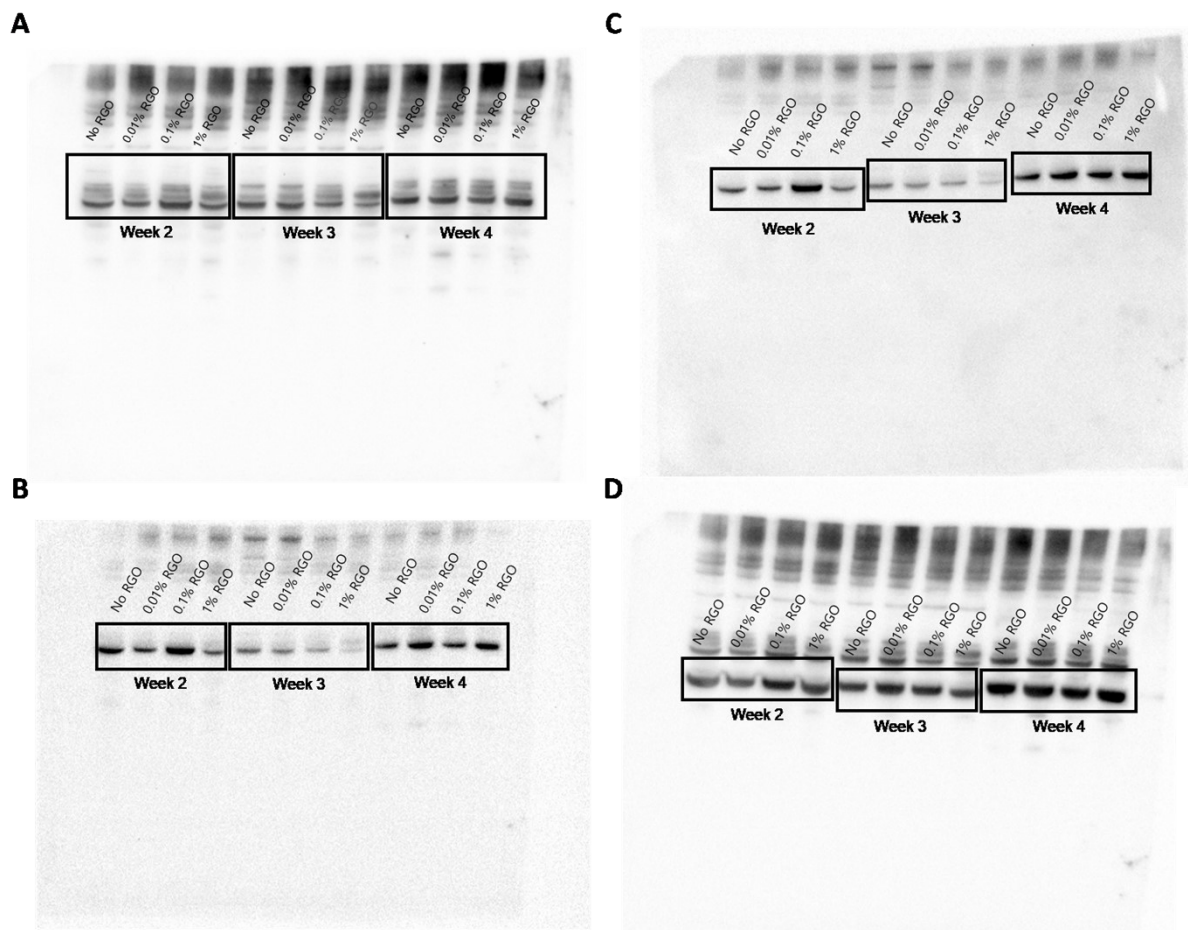

**Figure S6.** Osteogenic differentiation study of cells used in this study. Full gel images of the representative western blot results. (A)ALP, (B)RUNX-2, (C)OCN and (D) $\beta$ -actin expression of MC3T3-E1 was evaluated for 4 weeks.
